# Supplementary material for: Nanoparticle and nanorod TiO2 composite photoelectrodes with improved performance
Source: Royal Society of Chemistry journal article supplement (doi:10.1039/c1cc11092f), 2011-01-01
Supplement: c1cc11092f.pdf [file c1cc11092f.pdf]

# Nanoparticle and Nanorod TiO<sub>2</sub> Composite Photoelectrodes with Improved Performance

## Supporting Information

By Guo Ai, Wen-Tao Sun\*, Yi-Ling Zhang and Lian-Mao Peng\*

\*Corresponding author. wtaosun@pku.edu.cn, lmpeng@pku.edu.cn

**Fabrication of TiO<sub>2</sub> NR array, NP, NP-NR and NP+NR mixed photoelectrodes:** The TiO<sub>2</sub> NR arrays are fabricated directly onto the FTO substrate by hydrothermal method, similarly to that described by Liu et al. [1] The FTO is ultrasonic cleaned with acetone, ethanol and deionized (DI) water for ten minutes each and dried in nitrogen. They are put in a sealed Teflon reactor (60 mL) with well mixed solution which contains 15 mL of DI water, 15 mL of hydrochloride acid (36-38 wt %) and 0.5mL of tetrabutyl titanate. The reactor is heated to 160 °C for 12 hours. The resulting TiO<sub>2</sub> NRs are put into an acid Ti<sup>4+</sup> precursor solution to fabricate NP-NR electrode. Typically, the Ti<sup>4+</sup> concentration is 0.3-0.7M, and it was heated at about 70°C for 2-4h. The as-prepared film was pull out of the solution and dry in air, and the resulting solution is then dried and well dispersed in alcohol to make the TiO<sub>2</sub> NP film by spin coating method. The TiO<sub>2</sub> NP+NR mixed photoanodes were fabricated by mixed NP and NR with 1:1 in weight and following the same procedure as the NP film.

**DSSC Cell configuration:** TiO<sub>2</sub> NR, NP, NP-NR and NP+NR mixed photoanodes are annealed for one hour at 450 °C in air to improve the crystal structure. Then they are dipped in N719 solution for a whole day. The dye sensitized photoanodes and platinum coated glass are sandwiched using 25µm surlyn-film. The electrolyte is composed of 0.1 M of LiI, 0.6 M of 1, 2-dimethyl-3-n-propylimidazolium iodide (DMPPI), 0.05 M of I<sub>2</sub>, 1 M of 4-tert-butylpyridine (TBP) in methoxyacetonitrile. The cell area is about 0.12 cm<sup>2</sup>. The dye desorption of each TiO<sub>2</sub> sample is carried out by treatment in a certain volume of 0.1M NaOH (aq). A UV-vis spectrophotometer (UV 5000 spectrometer, Cary) was employed to measure the dye absorption of different concentration of the desorbed-dye solution at 500nm.

**Characterization of TiO<sub>2</sub> NR arrays, NP, NP-NR and NP+NR mixed photoelectrodes:** The morphology characterizations of the TiO<sub>2</sub> NP-NR photoanode are carried out using a field-emission gun FEI Quanta 600F scanning electron microscope and a Tecnai G20 transmission electron microscope. A Rigaku D/max-rA12kW X-ray diffraction system is used to test the structure of the samples. The device performance of the TiO<sub>2</sub> NP-NR structure based DSSC is recorded by an electrochemical analyzer (CHI660C Instruments), under AM 1.5 simulated sunlight, produced by a 300-W Oriel Solar Simulator (Model, 91160) with the illumination intensity being 100mW/cm<sup>2</sup>. The efficiency is calculated by the following formula,  $\eta = \frac{P_{\max}}{I_0} = \frac{I_{\max} V_{\max}}{I_0}$ , where P<sub>max</sub> is the maximum output power; I<sub>max</sub> and V<sub>max</sub> is the corresponding current density and photo-voltage, respectively; I<sub>0</sub> is the

incident light intensity. The IPCE are tested using power meter model 2931-c with motorized 1/4 monochromator models 74125 as the light source.

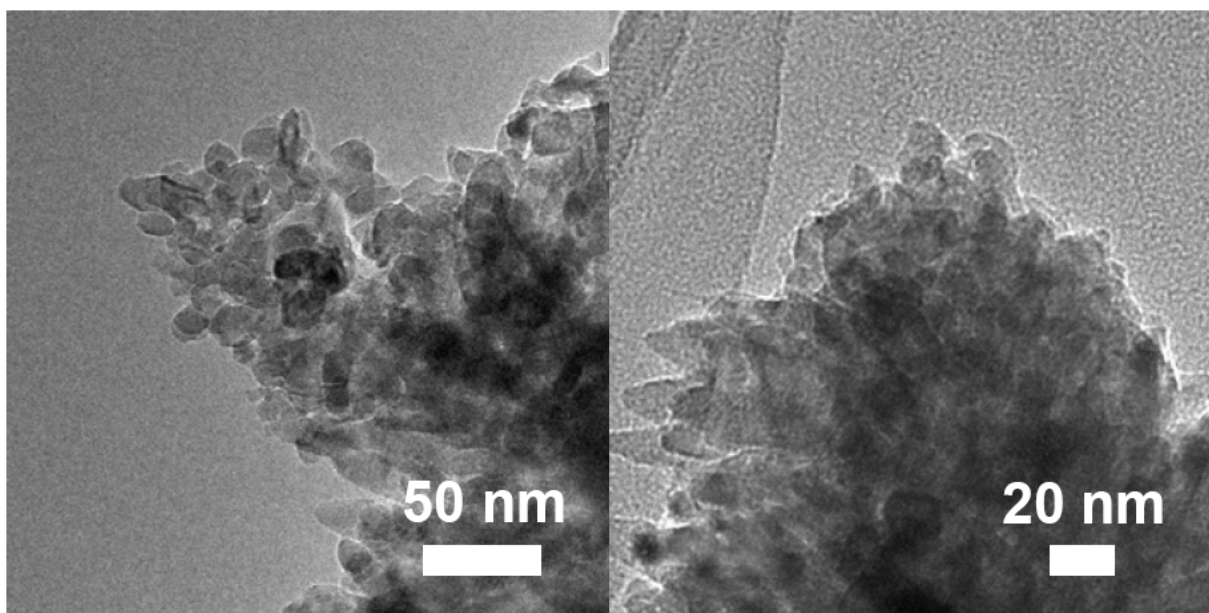

Fig S1 TEM images of the NPs in NP-NR composite electrode (high magnitude)

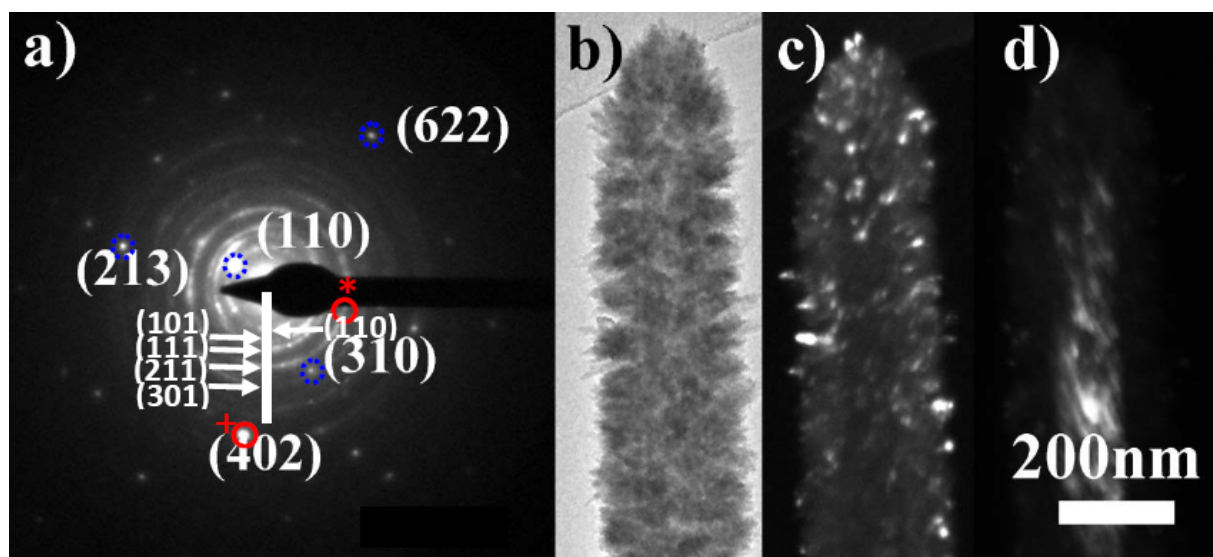

Fig S2 (a) Selected-area electron-diffraction (SAED) of  $\text{TiO}_2$  NP-NR composite (b)TEM image of the NP-NR composite and dark field images(c), (d) from the diffraction spots marked by red star and plus in Figure S2 (a) respectively.

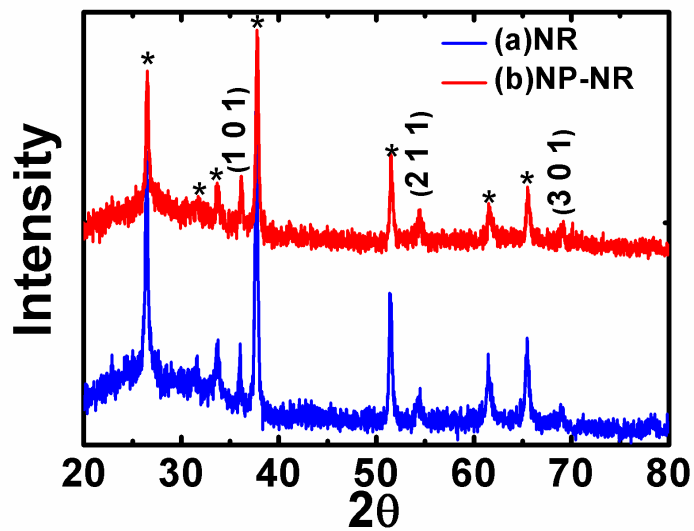

Fig S3 XRD patterns of TiO<sub>2</sub> NRs (blue) and NP-NRs (red) (asterisks stands for FTO substrate).

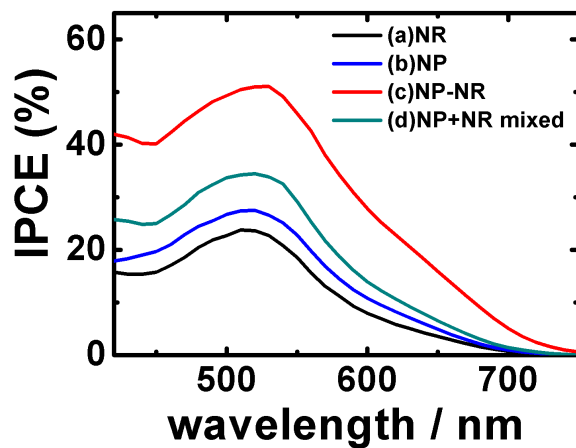

Fig S4 Incident photon-current conversion efficiency of NR, NP, NP-NR and NP+NR mixed solar cells.

#### Reference

- 1 B. Liu, E. S. Aydil, *J. Am. Chem. Soc.*, 2009, **131**, 3985.
